# Supplementary material for: Promoting Early Presentation of Breast Cancer in Older Women: Implementing an Evidence-Based Intervention in Routine Clinical Practice
Source: Hindawi journal article supplement (doi:10.1155/2012/835167), 2012-01-01
Supplement: f1 [file 835167.f1.pdf]

## Appendix

### Quality criteria to assess mammographers' competence to deliver the intervention

|                                                                                                                                     |                                             |                             |
|----------------------------------------------------------------------------------------------------------------------------------------------------------------------------------------------------------------------|---------------------------------------------|-----------------------------|
| <b>PEP Intervention Quality Criteria</b><br>Please note that items in <i>italics</i> cannot be rated on interventions that are only audio recorded<br><b>E</b> = Essential criteria<br><b>D</b> = Desirable criteria |                                             |                             |
| Name of mammographer:                                                                                                                                                                                                | Date of intervention:                       |                             |
| Name of assessor:                                                                                                                                                                                                    | Date of assessment:                         |                             |
| <b>Informing and motivating: Introducing and explaining the purpose of the intervention</b>                                                                                                                          |                                             |                             |
| 1. Mammographer mentions that the woman may access further screening and how she may do this                                                                                                                         | <input type="checkbox"/> Yes                | <input type="checkbox"/> No |
| 2. Mammographer delivers the key message about the benefits of early presentation                                                                                                                                    | <input checked="" type="checkbox"/> Yes (E) | <input type="checkbox"/> No |
| 3. Mammographer asks an open question to elicit concerns from the woman and responds appropriately                                                                                                                   | <input checked="" type="checkbox"/> Yes (E) | <input type="checkbox"/> No |
| 4. Mammographer explains that the booklet contains all the information that the mammographer will cover during the intervention                                                                                      | <input type="checkbox"/> Yes                | <input type="checkbox"/> No |
| 5. Mammographer consistently adheres to the order of the schedule in this section                                                                                                                                    | <input checked="" type="checkbox"/> Yes (D) | <input type="checkbox"/> No |
| Comments:                                                                                                                                                                                                            |                                             |                             |
| <b>Informing: Risk of developing breast cancer</b>                                                                                                                                                                   |                                             |                             |
| 6. Mammographer explains that risk of the woman developing breast cancer is increasing with age                                                                                                                      | <input checked="" type="checkbox"/> Yes (E) | <input type="checkbox"/> No |
| 7. Mammographer consistently adheres to the order of the schedule in this section                                                                                                                                    | <input checked="" type="checkbox"/> Yes (D) | <input type="checkbox"/> No |
| Comments:                                                                                                                                                                                                            |                                             |                             |
| <b>Informing: Describing the 10 symptoms of breast cancer in their 5 groups</b>                                                                                                                                      |                                             |                             |
| Mammographer mentions the following symptoms of breast cancer:                                                                                                                                                       |                                             |                             |
| <b>Lump</b>                                                                                                                                                                                                          |                                             |                             |
| 8. Lump or thickening in breast                                                                                                                                                                                      | <input type="checkbox"/> Yes                | <input type="checkbox"/> No |
| 9. Lump or thickening in armpit                                                                                                                                                                                      | <input type="checkbox"/> Yes                | <input type="checkbox"/> No |
| <b>Changes to the nipple</b>                                                                                                                                                                                         |                                             |                             |
| 10. Size, shape and position of the nipple                                                                                                                                                                           | <input type="checkbox"/> Yes                | <input type="checkbox"/> No |
| 11. Nipple inversion                                                                                                                                                                                                 | <input type="checkbox"/> Yes                | <input type="checkbox"/> No |
| 12. Rash around the nipple                                                                                                                                                                                           | <input type="checkbox"/> Yes                | <input type="checkbox"/> No |
| 13. Nipple discharge or bleeding                                                                                                                                                                                     | <input type="checkbox"/> Yes                | <input type="checkbox"/> No |
| <b>Changes to the skin</b>                                                                                                                                                                                           |                                             |                             |
| 14. Puckering/dimpling of the breast skin                                                                                                                                                                            | <input type="checkbox"/> Yes                | <input type="checkbox"/> No |
| 15. Redness of the breast skin                                                                                                                                                                                       | <input type="checkbox"/> Yes                | <input type="checkbox"/> No |
| <b>Changes to the whole breast</b>                                                                                                                                                                                   |                                             |                             |
| 16. Change in size/shape of the breast                                                                                                                                                                               | <input type="checkbox"/> Yes                | <input type="checkbox"/> No |
| <b>Pain</b>                                                                                                                                                                                                          |                                             |                             |
| 17. Pain/discomfort                                                                                                                                                                                                  | <input type="checkbox"/> Yes                | <input type="checkbox"/> No |
| 18. Mammographer clearly clusters the symptoms into 5 groups: lump, nipple changes, skin changes, changes to the whole breast and pain                                                                               | <input checked="" type="checkbox"/> Yes (E) | <input type="checkbox"/> No |
| 19. Mammographer consistently adheres to the order of the schedule in this section                                                                                                                                   | <input checked="" type="checkbox"/> Yes (D) | <input type="checkbox"/> No |
| Comments:                                                                                                                                                                                                            |                                             |                             |

| Behavioural skills: Demonstrating breast cancer awareness                                                                                                                                |                                             |                             |  |
|------------------------------------------------------------------------------------------------------------------------------------------------------------------------------------------|---------------------------------------------|-----------------------------|--|
| 20. Mammographer explains that it is important to be aware of how breasts normally look and feel so that the woman is more likely to notice changes                                      | <input type="checkbox"/> Yes                | <input type="checkbox"/> No |  |
| 21. Mammographers suggests that the woman make breast checking part of routine                                                                                                           | <input checked="" type="checkbox"/> Yes (E) | <input type="checkbox"/> No |  |
| 22. Mammographer describes and <i>demonstrates</i> how to look at breasts in the mirror                                                                                                  | <input type="checkbox"/> Yes                | <input type="checkbox"/> No |  |
| 23. Mammographer describes and <i>demonstrates</i> how to feel breasts                                                                                                                   | <input type="checkbox"/> Yes                | <input type="checkbox"/> No |  |
| 24. Mammographer consistently adheres to the order of the schedule in this section                                                                                                       | <input checked="" type="checkbox"/> Yes (D) | <input type="checkbox"/> No |  |
| Comments:                                                                                                                                                                                |                                             |                             |  |
|                                                                                                                                                                                          |                                             |                             |  |
| Motivating: Delivering the key message to see GP on discovering a breast change                                                                                                          |                                             |                             |  |
| 25. Mammographer delivers the key message to see the GP straightaway when discovering a breast change                                                                                    | <input checked="" type="checkbox"/> Yes (E) | <input type="checkbox"/> No |  |
| 26. Mammographers explains that the woman should ask for the earliest possible appointment/within a week                                                                                 | <input type="checkbox"/> Yes                | <input type="checkbox"/> No |  |
| 27. Mammographer delivers the key message about the benefits of early presentation and that it will give reassurance if it is not cancer                                                 | <input type="checkbox"/> Yes                | <input type="checkbox"/> No |  |
| 28. Mammographer consistently adheres to the order of the schedule in this section                                                                                                       | <input checked="" type="checkbox"/> Yes (D) | <input type="checkbox"/> No |  |
| Comments:                                                                                                                                                                                |                                             |                             |  |
|                                                                                                                                                                                          |                                             |                             |  |
| Behavioural skills: Action planning                                                                                                                                                      |                                             |                             |  |
| 29. Mammographer explains that the action plan will help the woman plan where and when she will check her breasts and to get an appointment to see the GP on discovering a breast change | <input type="checkbox"/> Yes                | <input type="checkbox"/> No |  |
| 30. Mammographer recommends that the woman fills in the action plan at home                                                                                                              | <input type="checkbox"/> Yes                | <input type="checkbox"/> No |  |
| 31. Mammographer gives the booklet to the woman                                                                                                                                          | <input type="checkbox"/> Yes                | <input type="checkbox"/> No |  |
| Comments                                                                                                                                                                                 |                                             |                             |  |
|                                                                                                                                                                                          |                                             |                             |  |
| Debrief and final queries                                                                                                                                                                |                                             |                             |  |
| 32. Mammographer enquires if there are any questions or comments                                                                                                                         | <input type="checkbox"/> Yes                | <input type="checkbox"/> No |  |
| 33. Mammographer consistently adheres to the order of the schedule in this section                                                                                                       | <input type="checkbox"/> Yes                | <input type="checkbox"/> No |  |
| Comments:                                                                                                                                                                                |                                             |                             |  |
|                                                                                                                                                                                          |                                             |                             |  |

| Style                                                                                                                                                                                                                                    |              |       |
|------------------------------------------------------------------------------------------------------------------------------------------------------------------------------------------------------------------------------------------|--------------|-------|
| 1. Mammographer uses motivational verbal and non-verbal behaviour (e.g. is enthusiastic, energised and encouraging, uses eye contact, smiles, is confident and uses posture and tone to emphasise key points)                            | Insufficient | 0     |
|                                                                                                                                                                                                                                          | Sufficient   | 1 (E) |
|                                                                                                                                                                                                                                          | Very Good    | 2     |
| 2. Mammographer frames her responses to questions in a positive way (e.g. emphasises the benefits of breast checking rather than the negative consequences of not breast checking)                                                       | Insufficient | 0     |
|                                                                                                                                                                                                                                          | Sufficient   | 1 (E) |
|                                                                                                                                                                                                                                          | Very Good    | 2     |
| 3. Mammographer delivers the intervention in a collaborative manner with good reference to and 'sharing' of booklet throughout. Acknowledges and responds to client's comments or questions. Uses inclusive language (e.g. 'we' or 'us') | Insufficient | 0     |
|                                                                                                                                                                                                                                          | Sufficient   | 1 (E) |
|                                                                                                                                                                                                                                          | Very Good    | 2     |
| Comments:                                                                                                                                                                                                                                |              |       |
| Time to complete Intervention (minutes and seconds):                                                                                                                                                                                     |              |       |
| CONTENT Total (out of 33)                                                                                                                                                                                                                |              |       |
| STYLE Total (out of 6)                                                                                                                                                                                                                   |              |       |
| Summary comments:                                                                                                                                                                                                                        |              |       |

| Behavioural skills: Demonstrating breast cancer awareness                                                                                                                                |                                             |                             |  |
|------------------------------------------------------------------------------------------------------------------------------------------------------------------------------------------|---------------------------------------------|-----------------------------|--|
| 20. Mammographer explains that it is important to be aware of how breasts normally look and feel so that the woman is more likely to notice changes                                      | <input type="checkbox"/> Yes                | <input type="checkbox"/> No |  |
| 21. Mammographers suggests that the woman make breast checking part of routine                                                                                                           | <input checked="" type="checkbox"/> Yes (E) | <input type="checkbox"/> No |  |
| 22. Mammographer describes and <i>demonstrates</i> how to look at breasts in the mirror                                                                                                  | <input type="checkbox"/> Yes                | <input type="checkbox"/> No |  |
| 23. Mammographer describes and <i>demonstrates</i> how to feel breasts                                                                                                                   | <input type="checkbox"/> Yes                | <input type="checkbox"/> No |  |
| 24. Mammographer consistently adheres to the order of the schedule in this section                                                                                                       | <input checked="" type="checkbox"/> Yes (D) | <input type="checkbox"/> No |  |
| Comments:                                                                                                                                                                                |                                             |                             |  |
|                                                                                                                                                                                          |                                             |                             |  |
| Motivating: Delivering the key message to see GP on discovering a breast change                                                                                                          |                                             |                             |  |
| 25. Mammographer delivers the key message to see the GP straightaway when discovering a breast change                                                                                    | <input checked="" type="checkbox"/> Yes (E) | <input type="checkbox"/> No |  |
| 26. Mammographers explains that the woman should ask for the earliest possible appointment/within a week                                                                                 | <input type="checkbox"/> Yes                | <input type="checkbox"/> No |  |
| 27. Mammographer delivers the key message about the benefits of early presentation and that it will give reassurance if it is not cancer                                                 | <input type="checkbox"/> Yes                | <input type="checkbox"/> No |  |
| 28. Mammographer consistently adheres to the order of the schedule in this section                                                                                                       | <input checked="" type="checkbox"/> Yes (D) | <input type="checkbox"/> No |  |
| Comments:                                                                                                                                                                                |                                             |                             |  |
|                                                                                                                                                                                          |                                             |                             |  |
| Behavioural skills: Action planning                                                                                                                                                      |                                             |                             |  |
| 29. Mammographer explains that the action plan will help the woman plan where and when she will check her breasts and to get an appointment to see the GP on discovering a breast change | <input type="checkbox"/> Yes                | <input type="checkbox"/> No |  |
| 30. Mammographer recommends that the woman fills in the action plan at home                                                                                                              | <input type="checkbox"/> Yes                | <input type="checkbox"/> No |  |
| 31. Mammographer gives the booklet to the woman                                                                                                                                          | <input type="checkbox"/> Yes                | <input type="checkbox"/> No |  |
| Comments                                                                                                                                                                                 |                                             |                             |  |
|                                                                                                                                                                                          |                                             |                             |  |
| Debrief and final queries                                                                                                                                                                |                                             |                             |  |
| 32. Mammographer enquires if there are any questions or comments                                                                                                                         | <input type="checkbox"/> Yes                | <input type="checkbox"/> No |  |
| 33. Mammographer consistently adheres to the order of the schedule in this section                                                                                                       | <input type="checkbox"/> Yes                | <input type="checkbox"/> No |  |
| Comments:                                                                                                                                                                                |                                             |                             |  |
|                                                                                                                                                                                          |                                             |                             |  |

| Style                                                                                                                                                                                                                                    |              |       |
|------------------------------------------------------------------------------------------------------------------------------------------------------------------------------------------------------------------------------------------|--------------|-------|
| 1. Mammographer uses motivational verbal and non-verbal behaviour (e.g. is enthusiastic, energised and encouraging, uses eye contact, smiles, is confident and uses posture and tone to emphasise key points)                            | Insufficient | 0     |
|                                                                                                                                                                                                                                          | Sufficient   | 1 (E) |
|                                                                                                                                                                                                                                          | Very Good    | 2     |
| 2. Mammographer frames her responses to questions in a positive way (e.g. emphasises the benefits of breast checking rather than the negative consequences of not breast checking)                                                       | Insufficient | 0     |
|                                                                                                                                                                                                                                          | Sufficient   | 1 (E) |
|                                                                                                                                                                                                                                          | Very Good    | 2     |
| 3. Mammographer delivers the intervention in a collaborative manner with good reference to and 'sharing' of booklet throughout. Acknowledges and responds to client's comments or questions. Uses inclusive language (e.g. 'we' or 'us') | Insufficient | 0     |
|                                                                                                                                                                                                                                          | Sufficient   | 1 (E) |
|                                                                                                                                                                                                                                          | Very Good    | 2     |
| Comments:                                                                                                                                                                                                                                |              |       |
| Time to complete Intervention (minutes and seconds):                                                                                                                                                                                     |              |       |
| CONTENT Total (out of 33)                                                                                                                                                                                                                |              |       |
| STYLE Total (out of 6)                                                                                                                                                                                                                   |              |       |
| Summary comments:                                                                                                                                                                                                                        |              |       |
